# Supplementary material for: Tunable auto-combustion preparation of TiO2nanostructures as efficient adsorbents for the removal of an anionic textile dye
Source: Royal Society of Chemistry journal article supplement (doi:10.1039/c6ra27924d), 2017-01-01
Supplement: c6ra27924d1.pdf [file c6ra27924d1.pdf]

## Electronic Supplementary Information

Tunable auto-combustion preparation of TiO<sub>2</sub> nanostructures as efficient adsorbents  
for the removal of an anionic textile dye

Mostafa Y. Nassar<sup>1\*</sup>, Eman I. Ali<sup>1</sup>, Essam S. Zakaria<sup>2</sup>

<sup>1</sup>Chemistry Department, Faculty of Science, Benha University, Benha 13518, Egypt

<sup>2</sup>Hot Laboratories Center, Atomic Energy Authority, P.O. Box 13759, Cairo, Egypt

-----  
\*Corresponding authors:

Tel.: +20 1068727555; E-mail addresses: [m\\_y\\_nassar@yahoo.com](mailto:m_y_nassar@yahoo.com),  
[m\\_y\\_nassar@fsc.bu.eg.edu](mailto:m_y_nassar@fsc.bu.eg.edu).

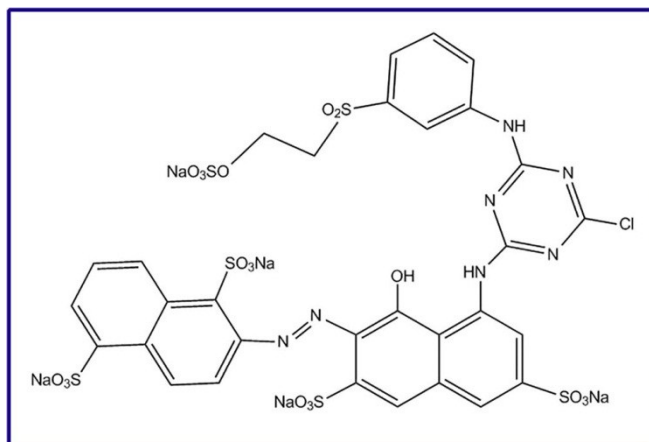

Scheme S1. Chemical structure of Reactive Red 195 dye (RR195).

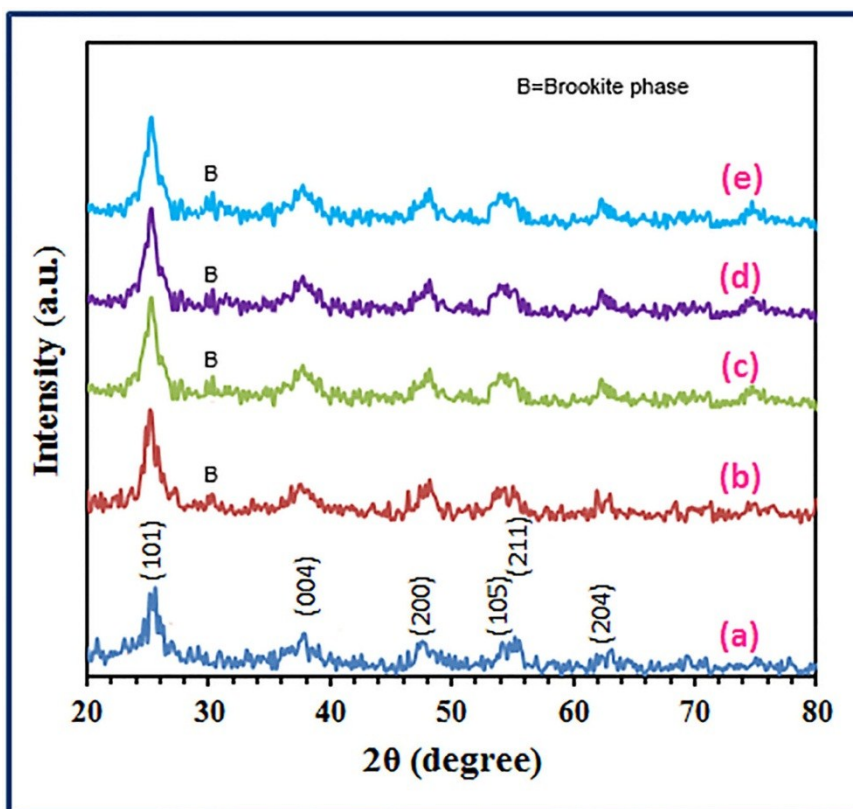

Fig. S1. XRD patterns of the as-synthesized  $\text{TiO}_2$  products calcined at 500 °C using L-alanine fuel.

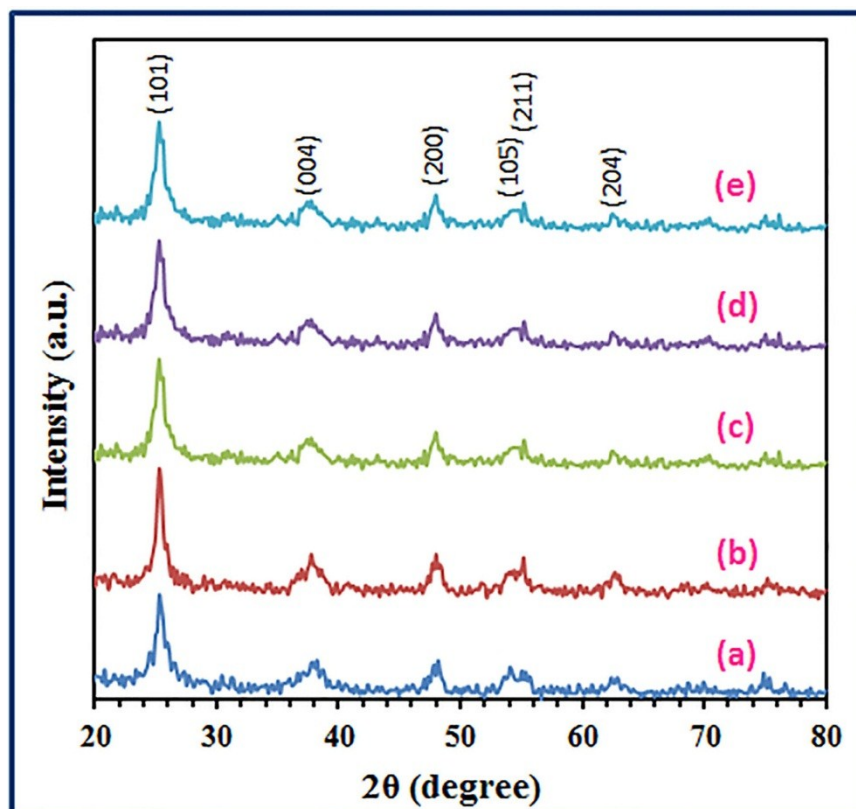

Fig. S2. XRD patterns of the as-synthesized TiO<sub>2</sub> products calcined at 500 °C using glycine fuel.

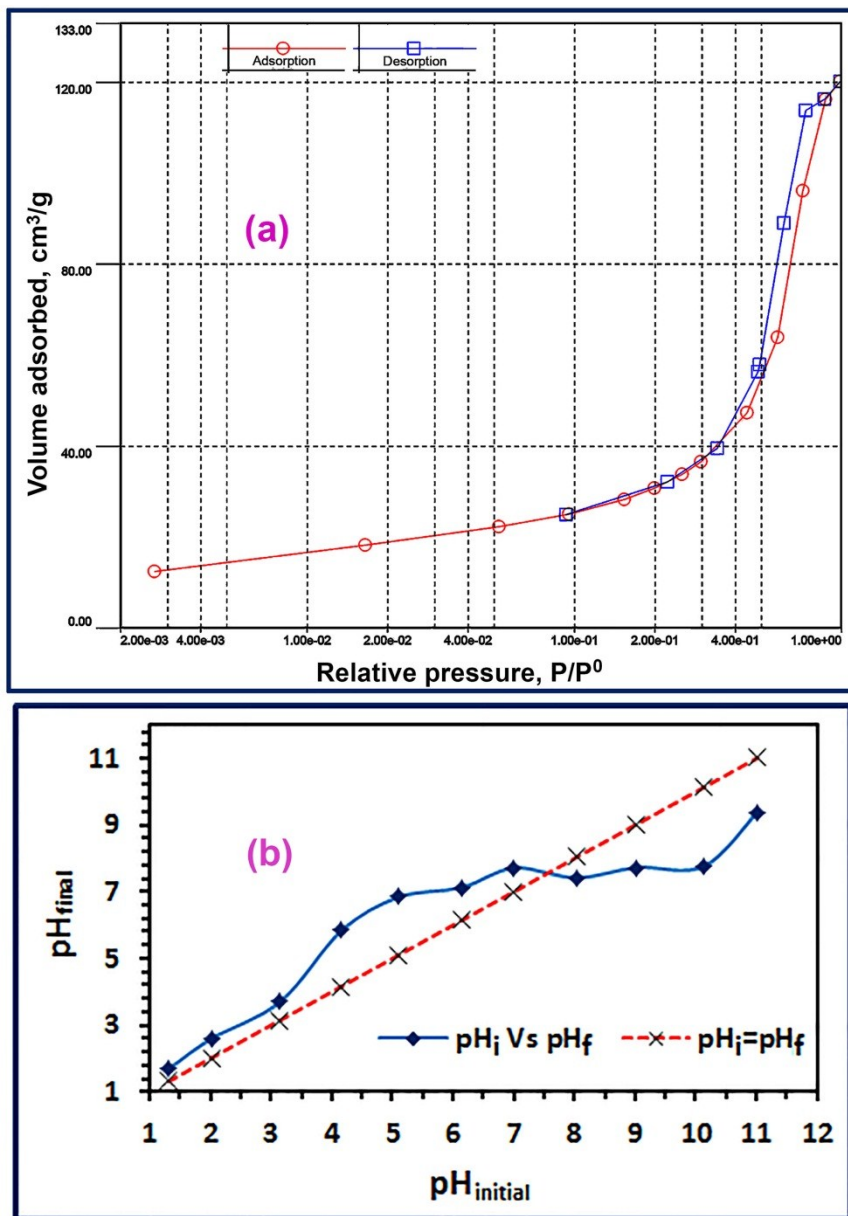

Fig. S3. N<sub>2</sub>-adsorption-desorption isotherm (BET) (a) and plot of pH<sub>initial</sub> versus pH<sub>final</sub> for estimation of pHP<sub>zc</sub> for TiO<sub>2</sub> product (b).
